# Supplementary material for: Stereoselective ring-opening polymerization of rac-lactides catalyzed by titanium complexes containing N,N-bidentate phenanthrene derivatives
Source: Royal Society of Chemistry journal article supplement (doi:10.1039/c4ra15822a), 2015-01-01
Supplement: c4ra15822a1.pdf [file c4ra15822a1.pdf]

## Supporting Information

# Stereoselective Ring-Opening Polymerization of *rac*-Lactides Catalyzed by Titanium Complexes Containing N, N-Bidentate Phenanthrene Derivatives

Bo Gao\*<sup>1,2</sup>, Qian Duan<sup>1</sup>, Yanhui Li<sup>1</sup>, Dongni Li<sup>1,3</sup>, Liqiu Zhang<sup>1</sup>, Yuan Cui\*<sup>1</sup>, Ninghai Hu<sup>2</sup> and Xuan Pang<sup>2</sup>

1. School of Materials Science and Engineering, Changchun University of Science and Technology, Changchun 130022, China. Tel: +86-431-85583016, Fax: +86-431-85583016. E-mail: [gaobo@ciac.ac.cn](mailto:gaobo@ciac.ac.cn)
2. Key Laboratory of Polymer Ecomaterials, Changchun Institute of Applied Chemistry Chinese Academy of Sciences, Changchun, 130022, China.
3. Department of Blood Transfusion, China–Japan Union Hospital, Jilin University, Changchun, 130033, China.

**Table S1.** Selected bond lengths (Å) and angles (deg) for complex **3**.

|           |           |           |           |
|-----------|-----------|-----------|-----------|
| Ti1–N1    | 1.893(4)  | Ti1–N2    | 1.919(4)  |
| Ti1–O1    | 1.798(4)  | Ti1–O2    | 1.856(4)  |
| O1–Ti1–N2 | 116.30(6) | O1–Ti1–O2 | 107.53(7) |
| O2–Ti1–N2 | 117.23(7) | N2–Ti1–N1 | 89.09(6)  |
| O1–Ti1–N1 | 116.34(7) | O2–Ti1–N1 | 109.62(8) |

**Table S2.** Crystallographic data for complex **3**.

|                       |                                                                  |
|-----------------------|------------------------------------------------------------------|
|                       | <b>3</b>                                                         |
| Formula               | C <sub>44</sub> H <sub>58</sub> N <sub>2</sub> O <sub>2</sub> Ti |
| <i>F</i> <sub>w</sub> | 694.82                                                           |
| crystal system        | Monoclinic                                                       |
| space group           | P 21/c                                                           |
| <i>a</i> (Å)          | 17.034(6)                                                        |
| <i>b</i> (Å)          | 18.233(6)                                                        |
| <i>c</i> (Å)          | 12.983(4)                                                        |
| <i>α</i> (deg)        | 90.00                                                            |
| <i>β</i> (deg)        | 94.444(6)                                                        |
| <i>γ</i> (deg)        | 90.00                                                            |

|                           |         |
|---------------------------|---------|
| $v$ (Å <sup>3</sup> )     | 4020(2) |
| $Z$                       | 4       |
| $\mu$ (mm <sup>-1</sup> ) | 0.249   |
| $R_{(int)}$               | 0.1269  |
| GOOF                      | 1.027   |
| $R_1$ [I>2sigma(I)]       | 0.0805  |
| $wR_2$ [I>2sigma(I)]      | 0.2158  |

---
